# Supplementary material
Source: Springer Nature journal article supplement (https://www.springermedizin.de/resource/supplementary/12959_2008_101_MOESM5_ESM.pdf/9569598)

# A Baseline ADP stimulation

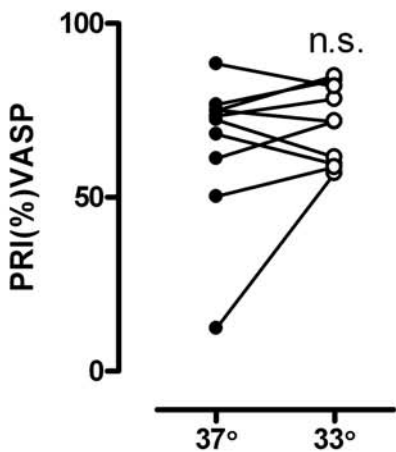

# B ADP after clopidogrel p.o.

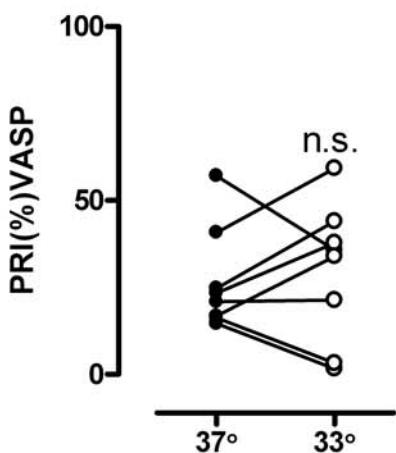

# C ADP and AZD6140 ex vivo

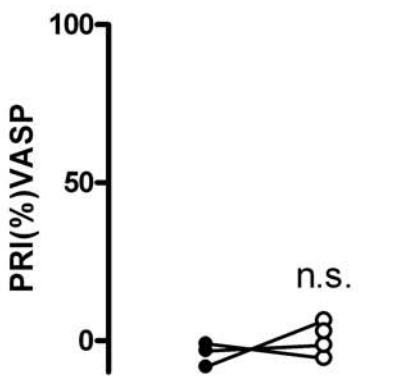

Supplement: MOESM5 [file 9569598]
